# Supplementary material
Source: publisher site journal article supplement (https://www.kjim.org/upload/media/kjim-2025-194-Supplementary-Table-3.pdf)
Supplement: Supplementary file 1 [file kjim-2025-194-Supplementary-Table-3.pdf]

**Supplementary Table 3. Diagnoses and procedural definitions of clinical outcomes based on ICD-10 codes**

|        |                                                                                                                                                                                                                                                                                                                                                      |
|--------|------------------------------------------------------------------------------------------------------------------------------------------------------------------------------------------------------------------------------------------------------------------------------------------------------------------------------------------------------|
| HF     | HF diagnoses were based on ICD-10 codes (I50, I42.0, I11.0, I13.0, I13.2) following hospital discharge                                                                                                                                                                                                                                               |
| MI     | MI was defined as hospitalization with discharge diagnoses coded as ICD-10 I21–I22 in patients who underwent coronary revascularization during the same admission. Revascularization procedures were identified through procedural codes (PCI: M6551–6654, M6561–6567, M6571, M6572, O1876–1877; CABG: O1640–1642, O1647–1649, OA640–642, OA647–649) |
| Stroke | Ischemic stroke was confirmed in patients with brain imaging and ICD-10 codes I63 and I64, while hemorrhagic stroke was similarly diagnosed with imaging and ICD-10 codes I60–62                                                                                                                                                                     |
| CAD    | CAD was defined as a history of MI or revascularization                                                                                                                                                                                                                                                                                              |
| PAD    | PAD was diagnosed in hospitalized patients with ICD-10 codes I70–71, I73.1, I73.8–9, I77.1, I79.0, I79.2, K55.1, K55.8–9, Z95.8–9, along with evidence of revascularization procedures (M6597, M6605, M6620, M6613, M6632, O0161–70, O1645, O1646, O2064, O2065, O2067, O2068)                                                                       |
| AF     | AF was defined as hospitalization due to AF, which was identified using ICD-10 code I48 as the primary diagnosis                                                                                                                                                                                                                                     |

AF, atrial fibrillation; CABG, coronary artery bypass grafting; CAD, coronary artery disease; HF, heart failure; ICD-10, International Classification of Diseases, 10th Revision; MI, myocardial infarction; PAD, peripheral artery disease; PCI, percutaneous coronary intervention.
